# Supplementary material for: Genome sequence analysis of the beneficial Bacillus subtilis PTA-271 isolated from a Vitis vinifera (cv. Chardonnay) rhizospheric soil: assets for sustainable biocontrol
Source: PubMed Central journal article supplement (PMC8067347; doi:10.1186/s40793-021-00372-3), 2021-01-29
Supplement: 40793_2021_372_MOESM1_ESM.pdf [file 40793_2021_372_MOESM1_ESM.pdf]

**Table S1 :** *Bacillus subtilis* PTA-271 encoding genes for motility, adhesion and plant root colonizing capacity

| <b>Locus tag ID</b>                                | <b>Gene</b>  | <b>Function</b>                                                   |
|----------------------------------------------------|--------------|-------------------------------------------------------------------|
| Motility (swarming), biofilm and root colonization |              |                                                                   |
| S19-40_00277                                       | <i>ylxH</i>  | Flagellum site-determining protein                                |
| S19-40_00278                                       | <i>flhF</i>  | Flagellar biosynthesis protein                                    |
| S19-40_00279                                       | <i>flhA</i>  | Flagellar biosynthesis protein                                    |
| S19-40_00280                                       | <i>flhB</i>  | Flagellar biosynthetic protein                                    |
| S19-40_00283                                       | <i>fliP</i>  | Flagellar biosynthetic protein                                    |
| S19-40_00286                                       | <i>fliN</i>  | Flagellar motor switch protein                                    |
| S19-40_00287                                       | <i>fliM</i>  | Flagellar motor switch protein                                    |
| S19-40_00289                                       | <i>flgG</i>  | Flagellar basal-body rod protein                                  |
| S19-40_00293                                       | <i>fliJ</i>  | Flagellar protein                                                 |
| S19-40_00296                                       | <i>fliG</i>  | Flagellar motor switch protein                                    |
| S19-40_00297                                       | <i>fliF</i>  | Flagellar M-ring protein                                          |
| S19-40_00298                                       | <i>fliE</i>  | Flagellar hook-basal body complex protein                         |
| S19-40_00299                                       | <i>flgC</i>  | Flagellar basal-body rod protein                                  |
| S19-40_00300                                       | <i>flgB</i>  | Flagellar basal body rod protein                                  |
| S19-40_00290                                       | <i>flgD</i>  | Basal-body rod modification protein                               |
| S19-40_00310                                       | <i>flhB</i>  | Flagellar biosynthetic protein                                    |
| S19-40_00890                                       | <i>flgK</i>  | Flagellar hook-associated protein 1                               |
| S19-40_00891                                       | <i>flaB3</i> | Flagellar filament 31 kDa core protein                            |
| S19-40_00893                                       | <i>fliW</i>  | Flagellar assembly factor                                         |
| S19-40_00895                                       | <i>hag</i>   | Flagellin                                                         |
| S19-40_00897                                       | <i>fliD</i>  | B-type flagellar hook-associated protein 2                        |
| S19-40_00898                                       | <i>fliS</i>  | Flagellar protein                                                 |
| S19-40_00557                                       | <i>motB</i>  | Motility protein B                                                |
| S19-40_02745                                       | <i>cheR</i>  | Chemotaxis protein methyltransferase                              |
| S19-40_00115                                       | <i>cheY</i>  | Chemotaxis protein                                                |
| S19-40_00272                                       | <i>cheD</i>  | Chemoreceptor glutamine deamidase                                 |
| S19-40_00273                                       | <i>cheC</i>  | CheY-P phosphatase                                                |
| S19-40_00274                                       | <i>cheW</i>  | Chemotaxis protein                                                |
| S19-40_00275                                       | <i>cheA</i>  | Chemotaxis protein                                                |
| S19-40_00276                                       | <i>cheB</i>  | Chemotaxis response regulator protein-glutamate methyltransferase |
| S19-40_00285                                       | <i>cheY</i>  | Chemotaxis protein                                                |
| S19-40_00519                                       | <i>cheV</i>  | Chemotaxis protein                                                |
| S19-40_02745                                       | <i>cheR</i>  | Chemotaxis protein methyltransferase                              |
| S19-40_03165                                       | <i>swrC</i>  | Swarming motility protein                                         |
| S19-40_00882                                       | <i>spo0A</i> | Response regulator receiver domain protein                        |
