# Supplementary material for: Genome sequence analysis of the beneficial Bacillus subtilis PTA-271 isolated from a Vitis vinifera (cv. Chardonnay) rhizospheric soil: assets for sustainable biocontrol
Source: PubMed Central journal article supplement (PMC8067347; doi:10.1186/s40793-021-00372-3), 2021-01-29
Supplement: 40793_2021_372_MOESM2_ESM.pdf [file 40793_2021_372_MOESM2_ESM.pdf]

**Table S2 :** *Bacillus subtilis* PTA-271 encoding genes for some Transcriptional regulators and Operons

| <b>Locus tag ID</b>               | <b>Gene</b>  | <b>Function</b>                                                              |
|-----------------------------------|--------------|------------------------------------------------------------------------------|
| <i>Transcriptional regulators</i> |              |                                                                              |
| S19-40_00006                      | purR         | LacI family transcriptional regulator, purine nucleotide synthesis repressor |
| S19-40_00012                      | immR         | HTH-type transcriptional regulator ImmR                                      |
| S19-40_00023                      | gltC         | HTH-type transcriptional regulator GltC                                      |
| S19-40_00025                      | sinR         | XRE family transcriptional regulator, master regulator for biofilm formation |
| S19-40_00049                      | slyA         | Transcriptional regulator SlyA                                               |
| S19-40_00060                      | gltC         | HTH-type transcriptional regulator GltC                                      |
| S19-40_00064                      | yofA         | HTH-type transcriptional regulator YofA                                      |
| S19-40_00173                      | glnR         | HTH-type transcriptional regulator GlnR                                      |
| S19-40_00212                      | betI         | HTH-type transcriptional regulator BetI                                      |
| S19-40_00255                      | infB         | Translation initiation factor IF-2                                           |
| S19-40_00268                      | tsf          | Elongation factor Ts                                                         |
| S19-40_00374                      | dksA         | RNA polymerase-binding transcription factor DksA                             |
| S19-40_00374                      | yocK         | General stress protein 16O                                                   |
| S19-40_00405                      | mraZ         | Transcriptional regulator MraZ                                               |
| S19-40_00506                      | argP         | HTH-type transcriptional regulator ArgP                                      |
| S19-40_00516                      | ykuD         | Putative L,D-transpeptidase YkuD                                             |
| S19-40_00529                      | splA         | Transcriptional regulator protein (SplA)                                     |
| S19-40_00549                      | yticD        | putative HTH-type transcriptional regulator YtcD                             |
| S19-40_00558                      | mhqR         | HTH-type transcriptional regulator MhqR                                      |
| S19-40_00593                      | mhqR         | HTH-type transcriptional regulator MhqR                                      |
| S19-40_00596                      | tnrA         | HTH-type transcriptional regulator TnrA                                      |
| S19-40_00599                      | splA         | Transcriptional regulator protein (SplA)                                     |
| S19-40_00614                      | ohrR         | Organic hydroperoxide resistance transcriptional regulator                   |
| S19-40_00667                      | yusO         | putative HTH-type transcriptional regulator YusO                             |
| S19-40_00690                      | crp          | CRP/FNR family transcriptional regulator, cyclic AMP receptor protein        |
| S19-40_00758                      | ywnA         | Putative HTH-type transcriptional regulator YwnA                             |
| S19-40_00761                      | zntR         | Zn(II)-responsive transcriptional regulator                                  |
| S19-40_00768                      | hipB         | Transcriptional regulator, y4mF family                                       |
| S19-40_00779                      | -            | putative HTH-type transcriptional regulator/GBAA_1941/BAS1801                |
| S19-40_00794                      | ulaR         | HTH-type transcriptional regulator UlaR                                      |
| S19-40_00809                      | gltR         | HTH-type transcriptional regulator GltR                                      |
| S19-40_00814                      | lrpC         | HTH-type transcriptional regulator LrpC                                      |
| S19-40_00823                      | hdfR         | HTH-type transcriptional regulator HdfR                                      |
| S19-40_00834                      | scrR         | LacI family transcriptional regulator, sucrose operon repressor              |
| S19-40_00841                      | ywtF         | Putative transcriptional regulator YwtF                                      |
| S19-40_00865                      | lytR         | Transcriptional regulator LytR                                               |
| S19-40_00879                      | yvhJ         | Putative transcriptional regulator YvhJ                                      |
| S19-40_00882                      | degU         | Transcriptional regulatory protein DegU                                      |
| S19-40_00882                      | <i>spo0A</i> | Response regulator receiver domain protein                                   |
| S19-40_00912                      | betI         | HTH-type transcriptional regulator BetI                                      |
| S19-40_00924                      | zitR         | Transcriptional regulator ZitR                                               |
| S19-40_00927                      | adcR         | Transcriptional regulator AdcR                                               |
| S19-40_00929                      | nanR         | Transcriptional regulator NanR                                               |
| S19-40_00962                      | phoB         | Phosphate regulon transcriptional regulatory protein PhoB                    |
| S19-40_00987                      | yvdT         | putative HTH-type transcriptional regulator YvdT                             |
| S19-40_00997                      | sinR         | HTH-type transcriptional regulator SinR                                      |
| S19-40_01016                      | lutR         | HTH-type transcriptional regulator LutR                                      |
| S19-40_01017                      | lacR         | HTH-type transcriptional regulator LacR                                      |
| S19-40_01028                      | desR         | Transcriptional regulatory protein DesR                                      |
| S19-40_01035                      | hdfR         | HTH-type transcriptional regulator HdfR                                      |
| S19-40_01050                      | opcR         | HTH-type transcriptional regulator, osmoprotectant uptake regulator          |
| S19-40_01060                      | opcR         | HTH-type transcriptional regulator, osmoprotectant uptake regulator          |
| S19-40_01067                      | yodB         | HTH-type transcriptional regulator YodB                                      |
| S19-40_01068                      | rghR         | HTH-type transcriptional repressor RghR                                      |
| S19-40_01069                      | rghR         | HTH-type transcriptional repressor RghR                                      |
| S19-40_01078                      | tetR         | Mycofactocin system transcriptional regulator                                |
| S19-40_01084                      | csor         | Copper-sensing transcriptional repressor CsoR                                |
| S19-40_01118                      | walR         | Transcriptional regulatory protein WalR                                      |
| S19-40_01132                      | liaR         | Transcriptional regulatory protein LiaR                                      |
| S19-40_01138                      | ethR         | HTH-type transcriptional regulator EthR                                      |
| S19-40_01140                      | cssR         | Transcriptional regulatory protein CssR                                      |
| S19-40_01148                      | gltR         | HTH-type transcriptional regulator GltR                                      |
| S19-40_01152                      | yusO         | putative HTH-type transcriptional regulator YusO                             |
| S19-40_01185                      | yurK         | putative HTH-type transcriptional regulator YurK                             |
| S19-40_01273                      | comA         | Transcriptional regulatory protein ComA                                      |
| S19-40_01288                      | dcuR         | Transcriptional regulatory protein DcuR                                      |
| S19-40_01325                      | ulaR         | HTH-type transcriptional regulator UlaR                                      |
| S19-40_01340                      | opcR         | HTH-type transcriptional repressor OpcR                                      |

|              |       |                                                                        |
|--------------|-------|------------------------------------------------------------------------|
| S19-40_01355 | -     | Transcriptional regulator, Acidobacterial, PadR-family                 |
| S19-40_01359 | tetR  | Tetracycline repressor protein class B from transposon Tn10            |
| S19-40_01367 | csor  | Copper-sensing transcriptional repressor CsoR                          |
| S19-40_01369 | tipA  | HTH-type transcriptional activator TipA                                |
| S19-40_01375 | gltR  | HTH-type transcriptional regulator GltR                                |
| S19-40_01379 | gltR  | HTH-type transcriptional regulator GltR                                |
| S19-40_01398 | cmpR  | HTH-type transcriptional activator CmpR                                |
| S19-40_01412 | adhR  | HTH-type transcriptional regulator AdhR                                |
| S19-40_01421 | dgaR  | Transcriptional regulatory protein DagR                                |
| S19-40_01424 | -     | Sugar-specific transcriptional regulator TrmB                          |
| S19-40_01430 | bm3R1 | HTH-type transcriptional repressor Bm3R1                               |
| S19-40_01468 | cymR  | HTH-type transcriptional regulator CymR                                |
| S19-40_01482 | comN  | Post-transcriptional regulator ComN                                    |
| S19-40_01499 | yebC  | putative transcriptional regulatory protein YebC                       |
| S19-40_01559 | yusO  | putative HTH-type transcriptional regulator YusO                       |
| S19-40_01574 | betI  | HTH-type transcriptional regulator BetI                                |
| S19-40_01606 | infC  | Translation initiation factor IF-3                                     |
| S19-40_01618 | nrdR  | Transcriptional repressor NrdR                                         |
| S19-40_01621 | ytcD  | putative HTH-type transcriptional regulator YtcD                       |
| S19-40_01629 | phoP  | Alkaline phosphatase synthesis transcriptional regulatory protein PhoP |
| S19-40_01660 | cmpR  | HTH-type transcriptional activator CmpR                                |
| S19-40_01683 | yttP  | putative HTH-type transcriptional regulator YttP                       |
| S19-40_01722 | ytzE  | putative HTH-type transcriptional regulator YtzE                       |
| S19-40_01733 | yesS  | HTH-type transcriptional regulator YesS                                |
| S19-40_01744 | lacR  | HTH-type transcriptional regulator LacR                                |
| S19-40_01764 | ytrA  | HTH-type transcriptional repressor YtrA                                |
| S19-40_01802 | dksA  | RNA polymerase-binding transcription factor DksA                       |
| S19-40_01845 | gmuR  | HTH-type transcriptional regulator GmuR                                |
| S19-40_01860 | rspR  | HTH-type transcriptional repressor RspR                                |
| S19-40_01863 | slyA  | Transcriptional regulator SlyA                                         |
| S19-40_01866 | tcaR  | HTH-type transcriptional regulator TcaR                                |
| S19-40_01872 | betI  | HTH-type transcriptional regulator BetI                                |
| S19-40_01894 | cmtR  | HTH-type transcriptional regulator CmtR                                |
| S19-40_01896 | norG  | HTH-type transcriptional regulator NorG                                |
| S19-40_01900 | aseR  | HTH-type transcriptional repressor AseR                                |
| S19-40_01901 | -     | putative HTH-type transcriptional regulator                            |
| S19-40_01904 | yybR  | putative HTH-type transcriptional regulator YybR                       |
| S19-40_01906 | yybR  | putative HTH-type transcriptional regulator YybR                       |
| S19-40_01909 | gabR  | HTH-type transcriptional regulatory protein GabR                       |
| S19-40_01921 | rhaS  | HTH-type transcriptional activator RhaS                                |
| S19-40_01923 | carD  | RNA polymerase-binding transcription factor CarD                       |
| S19-40_01927 | -     | Transcriptional regulator, y4mF family                                 |
| S19-40_01969 | dcuR  | Transcriptional regulatory protein DcuR                                |
| S19-40_01990 | lrpC  | HTH-type transcriptional regulator LrpC                                |
| S19-40_01999 | mtlR  | Transcriptional regulator MtlR                                         |
| S19-40_02005 | kipR  | HTH-type transcriptional regulator KipR                                |
| S19-40_02028 | gabR  | HTH-type transcriptional regulatory protein GabR                       |
| S19-40_02044 | srrA  | Transcriptional regulatory protein SrrA                                |
| S19-40_02058 | benM  | HTH-type transcriptional regulator BenM                                |
| S19-40_02064 | gabR  | HTH-type transcriptional regulatory protein GabR                       |
| S19-40_02082 | hpr   | HTH-type transcriptional regulator Hpr                                 |
| S19-40_02087 | yciB  | Putative L,D-transpeptidase YciB                                       |
| S19-40_02114 | mhqR  | HTH-type transcriptional regulator MhqR                                |
| S19-40_02148 | natR  | Transcriptional regulatory protein NatR                                |
| S19-40_02154 | yxaF  | putative HTH-type transcriptional regulator YxaF                       |
| S19-40_02167 | walR  | Transcriptional regulatory protein WalR                                |
| S19-40_02172 | lutR  | HTH-type transcriptional regulator LutR                                |
| S19-40_02207 | -     | Transcriptional regulator SlyA                                         |
| S19-40_02257 | ybbH  | putative HTH-type transcriptional regulator YbbH                       |
| S19-40_02291 | xre   | HTH-type transcriptional regulator Xre                                 |
| S19-40_02305 | exuR  | putative HTH-type transcriptional repressor ExuR                       |
| S19-40_02344 | manR  | Transcriptional regulator ManR                                         |
| S19-40_02402 | spxA  | Transcriptional regulator, Spx/MgsR family                             |
| S19-40_02449 | -     | Transcriptional regulator, Acidobacterial, PadR-family                 |
| S19-40_02468 | norG  | HTH-type transcriptional regulator NorG                                |
| S19-40_02472 | degA  | HTH-type transcriptional regulator DegA                                |
| S19-40_02497 | sgrR  | HTH-type transcriptional regulator SgrR                                |
| S19-40_02539 | bm3R1 | HTH-type transcriptional repressor Bm3R1                               |
| S19-40_02555 | hpr   | HTH-type transcriptional regulator Hpr                                 |
| S19-40_02602 | gabR  | HTH-type transcriptional regulatory protein GabR                       |
| S19-40_02607 | cysL  | HTH-type transcriptional regulator CysL                                |
| S19-40_02612 | nsrR  | HTH-type transcriptional repressor NsrR                                |

|              |       |                                                                                               |
|--------------|-------|-----------------------------------------------------------------------------------------------|
| S19-40_02617 | liaR  | Transcriptional regulatory protein LiaR                                                       |
| S19-40_02643 | ytrA  | HTH-type transcriptional repressor YtrA                                                       |
| S19-40_02786 | srrA  | Transcriptional regulatory protein SrrA                                                       |
| S19-40_02834 | xre   | HTH-type transcriptional regulator Xre                                                        |
| S19-40_02872 | ykuD  | Putative L,D-transpeptidase YkuD                                                              |
| S19-40_02880 | -     | Zn(II)-responsive transcriptional regulator                                                   |
| S19-40_02904 | argR  | Arginine repressor                                                                            |
| S19-40_02924 | efp   | Elongation factor P                                                                           |
| S19-40_02931 | mntR  | Transcriptional regulator MntR                                                                |
| S19-40_02940 | sinR  | HTH-type transcriptional regulator SinR                                                       |
| S19-40_02959 | spxA  | Transcriptional regulator, Spx/MgsR family                                                    |
| S19-40_02992 | zur   | Fur family transcriptional regulator, zinc uptake regulator                                   |
| S19-40_03061 | marR  | MarR family transcriptional regulator, multiple antibiotic resistance protein MarR            |
| S19-40_03147 | lrpC  | HTH-type transcriptional regulator LrpC                                                       |
| S19-40_03152 | trpR  | TrpR family transcriptional regulator, trp operon repressor                                   |
| S19-40_03164 | kstR2 | HTH-type transcriptional repressor KstR2                                                      |
| S19-40_03183 | -     | putative transcriptional regulatory protein                                                   |
| S19-40_03199 | yesS  | HTH-type transcriptional regulator YesS                                                       |
| S19-40_03219 | mprA  | Transcriptional repressor MprA                                                                |
| S19-40_03221 | IF5B  | translation initiation factor 5B                                                              |
| S19-40_03237 | yfmP  | HTH-type transcriptional regulator YfmP                                                       |
| S19-40_03254 | citT  | Transcriptional regulatory protein CitT                                                       |
| S19-40_03272 | treR  | HTH-type transcriptional regulator TreR                                                       |
| S19-40_03308 | glvR  | HTH-type transcriptional regulator GlvR                                                       |
| S19-40_03316 | degU  | Transcriptional regulatory protein DegU                                                       |
| S19-40_03325 | yusO  | putative HTH-type transcriptional regulator YusO                                              |
| S19-40_03379 | -     | Transcriptional regulator PadR-like family protein                                            |
| S19-40_03402 | liaR  | Transcriptional regulatory protein LiaR                                                       |
| S19-40_03450 | mgrA  | HTH-type transcriptional regulator MgrA                                                       |
| S19-40_03463 | cynR  | HTH-type transcriptional regulator CynR                                                       |
| S19-40_03472 | slrA  | Transcriptional regulator SlrA                                                                |
| S19-40_03472 | slrA  | Transcriptional regulator SlrA                                                                |
| S19-40_03494 | -     | Transcriptional regulator, Acidobacterial, PadR-family                                        |
| S19-40_03530 | cysL  | HTH-type transcriptional regulator CysL                                                       |
| S19-40_03537 | iscR  | HTH-type transcriptional regulator IscR                                                       |
| S19-40_03547 | btr   | HTH-type transcriptional activator Btr                                                        |
| S19-40_03554 | czrA  | HTH-type transcriptional repressor CzrA                                                       |
| S19-40_03562 | desR  | Transcriptional regulatory protein DesR                                                       |
| S19-40_03567 | dksA  | RNA polymerase-binding transcription factor DksA                                              |
| S19-40_03599 | yodB  | HTH-type transcriptional regulator YodB                                                       |
| S19-40_03634 | yusO  | putative HTH-type transcriptional regulator YusO                                              |
| S19-40_03677 | kdgR  | HTH-type transcriptional regulator KdgR                                                       |
| S19-40_03703 | tcxX  | putative transcriptional regulatory protein TcxX                                              |
| S19-40_03711 | walR  | Transcriptional regulatory protein WalR                                                       |
| S19-40_03729 | yybR  | putative HTH-type transcriptional regulator YybR                                              |
| S19-40_03734 | mta   | HTH-type transcriptional activator mta                                                        |
| S19-40_03739 | gltC  | HTH-type transcriptional regulator GltC                                                       |
| S19-40_03743 | slyA  | Transcriptional regulator SlyA                                                                |
| S19-40_03753 | -     | putative HTH-type transcriptional regulator                                                   |
| S19-40_03760 | purR  | HTH-type transcriptional repressor PurR                                                       |
| S19-40_03790 | yydK  | putative HTH-type transcriptional regulator YydK                                              |
| S19-40_03799 | gntR  | putative D-xylose utilization operon transcriptional repressor                                |
| S19-40_03804 | nicR  | MarR family transcriptional regulator, lower aerobic nicotinate degradation pathway regulator |
| S19-40_03806 | yxaf  | putative HTH-type transcriptional regulator Yxaf                                              |
| S19-40_03815 | dhaS  | HTH-type dhaKLM operon transcriptional activator DhaS                                         |
| S19-40_03885 | infA  | Translation initiation factor IF-1                                                            |
| S19-40_03911 | tuf   | Elongation factor Tu                                                                          |
| S19-40_03912 | fusA  | Elongation factor G                                                                           |
| S19-40_03940 | ctsR  | Transcriptional regulator CtsR                                                                |
| S19-40_03944 | -     | Transcriptional regulator, y4mF family                                                        |

---

*Operons*

---

|              |             |                                                                                             |
|--------------|-------------|---------------------------------------------------------------------------------------------|
| S19-40_00023 | cysL        | LysR family transcriptional regulator, transcriptional activator of the cysJI operon        |
| S19-40_00049 | HpaR        | homoprotocatechuate degradation operon regulator, HpaR                                      |
| S19-40_00060 | gltC        | LysR family transcriptional regulator, transcription activator of glutamate synthase operon |
| S19-40_00271 | fliA        | RNA polymerase sigma factor for flagellar operon FliA                                       |
| S19-40_00371 | pyrR        | pyrimidine operon attenuation protein / uracil phosphoribosyltransferase                    |
| S19-40_00482 | fruR2, fruR | DeoR family transcriptional regulator, fructose operon transcriptional repressor            |
| S19-40_00506 | cysL        | LysR family transcriptional regulator, transcriptional activator of the cysJI operon        |
| S19-40_00529 | splA        | transcriptional regulator of the spore photoproduct lyase operon                            |
| S19-40_00533 | gltC        | PtsGHI operon antiterminator                                                                |
| S19-40_00558 | HpaR        | HpaR: homoprotocatechuate degradation operon regulator, HpaR                                |
| S19-40_00593 | HpaR        | HpaR: homoprotocatechuate degradation operon regulator, HpaR                                |

|              |            |                                                                                                          |
|--------------|------------|----------------------------------------------------------------------------------------------------------|
| S19-40_00599 | splA       | transcriptional regulator of the spore photoproduct lyase operon                                         |
| S19-40_00614 | HpaR       | HpaR: homoprotocatechuate degradation operon regulator, HpaR                                             |
| S19-40_00779 | HpaR       | HpaR: homoprotocatechuate degradation operon regulator, HpaR                                             |
| S19-40_00823 | hcaR       | Hca operon transcriptional activator HcaR                                                                |
| S19-40_00834 | scrR       | LacI family transcriptional regulator, sucrose operon repressor                                          |
| S19-40_00884 | comFA      | ComF operon protein 1                                                                                    |
| S19-40_00885 | comFB      | ComF operon protein 2                                                                                    |
| S19-40_00887 | YvyF       | YvyF: flagellar operon protein                                                                           |
| S19-40_00912 | mexL       | TetR/AcrR family transcriptional regulator, mexJK operon transcriptional repressor                       |
| S19-40_00927 | HpaR       | HpaR: homoprotocatechuate degradation operon regulator, HpaR                                             |
| S19-40_01035 | gltC       | LysR family transcriptional regulator, transcription activator of glutamate synthase operon              |
| S19-40_01037 | araR       | GntR family transcriptional regulator, arabinose operon transcriptional repressor                        |
| S19-40_01078 | acrR       | TetR/AcrR family transcriptional regulator, multidrug resistance operon repressor                        |
| S19-40_01106 | btr        | AraC family transcriptional regulator, transcriptional activator for feuABC-ybbA operon                  |
| S19-40_01116 | fliA       | RNA polymerase sigma factor for flagellar operon FliA                                                    |
| S19-40_01138 | nemR       | TetR/AcrR family transcriptional regulator, transcriptional repressor for nem operon                     |
| S19-40_01152 | HpaR       | HpaR: homoprotocatechuate degradation operon regulator, HpaR                                             |
| S19-40_01185 | frlR       | GntR family transcriptional regulator, frlABCD operon transcriptional regulator                          |
| S19-40_01325 | srlR       | Glucitol operon repressor                                                                                |
| S19-40_01365 | pspE       | phageshock_pspE: phage shock operon rhodanese PspE                                                       |
| S19-40_01421 | gfrR       | sigma-54 dependent transcriptional regulator, gfr operon transcriptional activator                       |
| S19-40_01430 | fatR, bscR | TetR/AcrR family transcriptional regulator, repressor of fatR-cypB operon                                |
| S19-40_01559 | HpaR       | HpaR: homoprotocatechuate degradation operon regulator, HpaR                                             |
| S19-40_01660 | ytlI       | LysR family transcriptional regulator, regulator of the ytml operon                                      |
| S19-40_01683 | fatR, bscR | TetR/AcrR family transcriptional regulator, repressor of fatR-cypB operon                                |
| S19-40_01695 | cytR       | LacI family transcriptional regulator, repressor for deo operon, udp, cdd, tsx, nupC, and nupG           |
| S19-40_01733 | btr        | AraC family transcriptional regulator, transcriptional activator for feuABC-ybbA operon                  |
| S19-40_01744 | cytR       | LacI family transcriptional regulator, repressor for deo operon, udp, cdd, tsx, nupC, and nupG           |
| S19-40_01764 | -          | trehalos_R_Bsub: trehalose operon repressor                                                              |
| S19-40_01771 | caiE       | Carnitine operon protein CaiE                                                                            |
| S19-40_01845 | -          | trehalos_R_Bsub: trehalose operon repressor                                                              |
| S19-40_01860 | rspR       | GntR family transcriptional regulator, rspAB operon transcriptional repressor                            |
| S19-40_01901 | mexL       | TetR/AcrR family transcriptional regulator, mexJK operon transcriptional repressor                       |
| S19-40_01911 | fatR, bscR | TetR/AcrR family transcriptional regulator, repressor of fatR-cypB operon                                |
| S19-40_01921 | rhaS       | AraC family transcriptional regulator, L-rhamnose operon regulatory protein RhaS                         |
| S19-40_01984 | bcsB       | cellulose synthase operon protein B                                                                      |
| S19-40_01999 | mtlR       | mannitol operon transcriptional antiterminator                                                           |
| S19-40_02105 | gltC       | LysR family transcriptional regulator, transcription activator of glutamate synthase operon              |
| S19-40_02114 | HpaR       | HpaR: homoprotocatechuate degradation operon regulator, HpaR                                             |
| S19-40_02154 | lmrA, yxaF | TetR/AcrR family transcriptional regulator, lmrAB and yxaGH operons repressor                            |
| S19-40_02186 | -          | trehalos_R_Bsub: trehalose operon repressor                                                              |
| S19-40_02202 | rhaS       | AraC family transcriptional regulator, L-rhamnose operon regulatory protein RhaS                         |
| S19-40_02233 | arsR       | Arsenical resistance operon repressor                                                                    |
| S19-40_02262 | btr        | AraC family transcriptional regulator, transcriptional activator for feuABC-ybbA operon                  |
| S19-40_02263 | btr        | AraC family transcriptional regulator, transcriptional activator for feuABC-ybbA operon                  |
| S19-40_02344 | manR       | activator of the mannose operon, transcriptional antiterminator                                          |
| S19-40_02472 | cytR       | LacI family transcriptional regulator, repressor for deo operon, udp, cdd, tsx, nupC, and nupG           |
| S19-40_02473 | araC       | Arabinose operon regulatory protein                                                                      |
| S19-40_02500 | cytR       | LacI family transcriptional regulator, repressor for deo operon, udp, cdd, tsx, nupC, and nupG           |
| S19-40_02539 | fatR, bscR | TetR/AcrR family transcriptional regulator, repressor of fatR-cypB operon                                |
| S19-40_02594 | merR1      | Mercuric resistance operon regulatory protein                                                            |
| S19-40_02623 | glpP       | Glycerol uptake operon antiterminator regulatory protein                                                 |
| S19-40_02649 | HpaR       | HpaR: homoprotocatechuate degradation operon regulator, HpaR                                             |
| S19-40_02717 | birA       | BirA family transcriptional regulator, biotin operon repressor / biotin--[acetyl-CoA-carboxylase] ligase |
| S19-40_02933 | pspE       | phageshock_pspE: phage shock operon rhodanese PspE                                                       |
| S19-40_02946 | comGG      | ComG operon protein 7                                                                                    |
| S19-40_02950 | comGC      | ComG operon protein 3                                                                                    |
| S19-40_02952 | comGA      | ComG operon protein 1                                                                                    |
| S19-40_03041 | comEC      | ComE operon protein 3                                                                                    |
| S19-40_03042 | comEB      | ComE operon protein 2                                                                                    |
| S19-40_03043 | comEA      | ComE operon protein 1                                                                                    |
| S19-40_03075 | nemR       | TetR/AcrR family transcriptional regulator, transcriptional repressor for nem operon                     |
| S19-40_03104 | gutR       | LuxR family transcriptional regulator, glucitol operon activator                                         |
| S19-40_03152 | trpR       | TrpR family transcriptional regulator, trp operon repressor                                              |
| S19-40_03199 | btr        | AraC family transcriptional regulator, transcriptional activator for feuABC-ybbA operon                  |
| S19-40_03219 | emrR, mprA | MarR family transcriptional regulator, negative regulator of the multidrug operon emrRAB                 |
| S19-40_03237 | yfmP       | MerR family transcriptional regulator, repressor of the yfmOP operon                                     |
| S19-40_03272 | -          | trehalos_R_Bsub: trehalose operon repressor                                                              |
| S19-40_03300 | acoR       | Acetoin dehydrogenase operon transcriptional activator AcoR                                              |
| S19-40_03308 | glvR       | RpiR family transcriptional regulator, glv operon transcriptional regulator                              |
| S19-40_03325 | HpaR       | HpaR: homoprotocatechuate degradation operon regulator, HpaR                                             |
| S19-40_03357 | perR       | Peroxide operon regulator                                                                                |

|              |            |                                                                                                           |
|--------------|------------|-----------------------------------------------------------------------------------------------------------|
| S19-40_03384 | licT, bglG | beta-glucoside operon transcriptional antiterminator                                                      |
| S19-40_03432 | licR       | putative licABCH operon regulator                                                                         |
| S19-40_03450 | HpaR       | HpaR: homoprotocatechuate degradation operon regulator, HpaR                                              |
| S19-40_03453 | sacY       | Levansucrase and sucrose synthesis operon antiterminator                                                  |
| S19-40_03463 | gltC       | LysR family transcriptional regulator, transcription activator of glutamate synthase operon               |
| S19-40_03473 | acrR, smeT | TetR/AcrR family transcriptional regulator, acrAB operon repressor                                        |
| S19-40_03488 | sacY       | Levansucrase and sucrose synthesis operon antiterminator                                                  |
| S19-40_03530 | cysL       | LysR family transcriptional regulator, transcriptional activator of the cysJI operon                      |
| S19-40_03547 | btr        | AraC family transcriptional regulator, transcriptional activator for feuABC-ybbA operon                   |
| S19-40_03634 | HpaR       | HpaR: homoprotocatechuate degradation operon regulator, HpaR                                              |
| S19-40_03642 | acoR       | sigma-54 dependent transcriptional regulator, acetoin dehydrogenase operon transcriptional activator AcoR |
| S19-40_03677 | kdgR       | LacI family transcriptional regulator, kdg operon repressor                                               |
| S19-40_03739 | gltC       | LysR family transcriptional regulator, transcription activator of glutamate synthase operon               |
| S19-40_03760 | scrR       | LacI family transcriptional regulator, sucrose operon repressor                                           |
| S19-40_03790 | -          | trehalos_R_Bsub: trehalose operon repressor                                                               |
| S19-40_03799 | gntR       | putative D-xylose utilization operon transcriptional repressor                                            |
| S19-40_03804 | HpaR       | HpaR: homoprotocatechuate degradation operon regulator, HpaR                                              |
| S19-40_03806 | lmrA, yxaF | TetR/AcrR family transcriptional regulator, lmrAB and yxaGH operons repressor                             |
| S19-40_03815 | dhaS       | HTH-type dhaKLM operon transcriptional activator DhaS                                                     |
| S19-40_03823 | srlR       | Glucitol operon repressor                                                                                 |
| S19-40_03839 | btr        | AraC family transcriptional regulator, transcriptional activator for feuABC-ybbA operon                   |
| S19-40_03856 | lsrR       | lsr operon transcriptional repressor                                                                      |
| S19-40_03865 | hutP       | Hut operon positive regulatory protein                                                                    |
| S19-40_03979 | purR       | Pur operon repressor                                                                                      |
