# Supplementary material for: Genome sequence analysis of the beneficial Bacillus subtilis PTA-271 isolated from a Vitis vinifera (cv. Chardonnay) rhizospheric soil: assets for sustainable biocontrol
Source: PubMed Central journal article supplement (PMC8067347; doi:10.1186/s40793-021-00372-3), 2021-01-29
Supplement: 40793_2021_372_MOESM3_ESM.pdf [file 40793_2021_372_MOESM3_ESM.pdf]

**Table S3 :** *Bacillus subtilis* PTA-271 encoding genes for antimicrobial molecules, other effectors and lytic enzymes

| Locus tag ID                                 | Gene             | Function                                                              |
|----------------------------------------------|------------------|-----------------------------------------------------------------------|
| <i>Bacteriocin/Bacteriocin-like-peptides</i> |                  |                                                                       |
| S19-40_00081                                 | menE             | AMP-binding enzyme                                                    |
| S19-40_00234                                 | albE             | Antilisterial bacteriocin subtilosin biosynthesis protein AlbE        |
| S19-40_00679                                 | albG             | Antilisterial bacteriocin subtilosin biosynthesis protein AlbG        |
| S19-40_00681                                 | albE             | Antilisterial bacteriocin subtilosin biosynthesis protein AlbE        |
| S19-40_00682                                 | albD             | Antilisterial bacteriocin subtilosin biosynthesis protein AlbD        |
| S19-40_00683                                 | btuD             | Lantibiotic protection ABC transporter, ATP-binding subunit           |
| S19-40_00684                                 | albB             | Antilisterial bacteriocin subtilosin biosynthesis protein AlbB        |
| S19-40_00685                                 | albA             | Antilisterial bacteriocin subtilosin biosynthesis protein AlbA        |
| S19-40_00690                                 | crp              | CRP/FNR family transcriptional regulator, cyclic AMP receptor protein |
| S19-40_00726                                 | ywIC             | Threonylcarbamoyl-AMP synthase                                        |
| S19-40_00946                                 | hisI             | Phosphoribosyl-AMP cyclohydrolase                                     |
| S19-40_00964                                 | btuD             | Putative bacteriocin export ABC transporter, lactococcin 972 group    |
| S19-40_01244                                 | dhbE             | 2,3-dihydroxybenzoate-AMP ligase                                      |
| S19-40_01246                                 | -                | AMP-binding enzyme                                                    |
| S19-40_01575                                 | -                | AMP-binding enzyme                                                    |
| S19-40_01689                                 | -                | AMP-binding enzyme                                                    |
| S19-40_01755                                 | bceB             | Bacitracin export permease protein BceB                               |
| S19-40_01756                                 | bceA             | Bacitracin export ATP-binding protein BceA                            |
| S19-40_01915                                 | -                | Bacteriocin-protection, YdeI or OmpD-Associated                       |
| S19-40_01966                                 | nukF, mcdF, sboF | lantibiotic transport system ATP-binding protein                      |
| S19-40_01998                                 | -                | AMP-binding enzyme                                                    |
| S19-40_01998                                 | -                | AMP-binding enzyme                                                    |
| S19-40_02046                                 | btuD             | Putative bacteriocin export ABC transporter, lactococcin 972 group    |
| S19-40_02071                                 | licA             | lichenysin synthetase A                                               |
| S19-40_02165                                 | btuD             | lantibiotic protection ABC transporter, ATP-binding subunit           |
| S19-40_02198                                 | -                | Trypsin                                                               |
| S19-40_02227                                 | skfF             | Putative bacteriocin-SkfA transport system permease protein SkfF      |
| S19-40_02641                                 | btuD             | Lantibiotic protection ABC transporter, ATP-binding subunit           |
| S19-40_03432                                 | licR             | lichenan operon transcriptional antiterminator                        |
| S19-40_03433                                 | licB             | Lichenan-specific phosphotransferase enzyme IIB component             |
| S19-40_03434                                 | licC             | Lichenan permease IIC component                                       |
| S19-40_03435                                 | licA             | Lichenan-specific phosphotransferase enzyme IIA component             |
| S19-40_03456                                 | licC             | Lichenan permease IIC component                                       |
| S19-40_03706                                 | -                | Trypsin-like peptidase domain protein                                 |
| S19-40_03836                                 | btuD             | Putative bacteriocin export ABC transporter, lactococcin 972 group    |
| <i>Other effectors</i>                       |                  |                                                                       |
| S19-40_00073                                 | fenC             | fengycin family lipopeptide synthetase A                              |
| S19-40_00074                                 | fenD             | fengycin family lipopeptide synthetase B                              |
| S19-40_00075                                 | -                | fengycin family lipopeptide synthetase C                              |
| S19-40_00076                                 | fenA             | fengycin family lipopeptide synthetase D                              |
| S19-40_00077                                 | fenB             | fengycin family lipopeptide synthetase E                              |
| S19-40_00208                                 | pksD             | bacillaene synthase trans-acting acyltransferase                      |
| S19-40_00567                                 | bacF             | Transaminase BacF                                                     |
| S19-40_00679                                 | albG             | Antilisterial bacteriocin subtilosin biosynthesis protein AlbG        |
| S19-40_00681                                 | albE             | Antilisterial bacteriocin subtilosin biosynthesis protein AlbE        |
| S19-40_00682                                 | albD             | Antilisterial bacteriocin subtilosin biosynthesis protein AlbD        |
| S19-40_00684                                 | albB             | Antilisterial bacteriocin subtilosin biosynthesis protein AlbB        |

|              |       |                                                                |
|--------------|-------|----------------------------------------------------------------|
| S19-40_00684 | albB  | Antilisterial bacteriocin subtilosin biosynthesis protein AlbB |
| S19-40_00685 | albA  | Antilisterial bacteriocin subtilosin biosynthesis protein AlbA |
| S19-40_00686 | sboA  | Subtilosin-A                                                   |
| S19-40_02068 | srfAD | Surfactin synthase thioesterase subunit                        |
| S19-40_02069 | srfAC | Surfactin synthase subunit 3                                   |
| S19-40_02070 | srfAB | Surfactin synthase subunit 2                                   |
| S19-40_02071 | srfAA | Surfactin synthase subunit 1                                   |
| S19-40_03525 | bacE  | Putative bacilysin exporter BacE                               |
| S19-40_03526 | bacF  | Transaminase BacF                                              |
| S19-40_03527 | bacG  | NADPH-dependent reductase BacG                                 |

---

*Siderophores*

|              |      |                                                 |
|--------------|------|-------------------------------------------------|
| S19-40_01242 | dhbA | 2,3-dihydro-2,3-dihydroxybenzoate dehydrogenase |
| S19-40_01243 | dhbC | Isochorismate synthase DhbC                     |
| S19-40_01244 | dhbE | 2,3-dihydroxybenzoate-AMP ligase                |
| S19-40_01245 | dhbB | Isochorismatase                                 |
| S19-40_01246 | dhbF | Dimodular nonribosomal peptide synthase         |

---

*Lytic enzymes*

|              |      |                                         |
|--------------|------|-----------------------------------------|
| S19-40_00094 | -    | Cellulase (glycosyl hydrolase family 5) |
| S19-40_00541 | sleB | Spore cortex-lytic enzyme               |
| S19-40_00651 | sleB | spore cortex-lytic enzyme               |
| S19-40_01400 | csn  | Chitosanase                             |
| S19-40_02204 | sleB | spore cortex-lytic enzyme               |
| S19-40_02296 | sleB | spore cortex-lytic enzyme               |
| S19-40_02768 | sleB | Spore cortex-lytic enzyme               |
| S19-40_03055 | sleB | spore cortex-lytic enzyme               |
| S19-40_03077 | sleB | spore cortex-lytic enzyme               |
| S19-40_03385 | bglS | Beta-glucanase                          |

---

*Proteases*

|              |      |                                                     |
|--------------|------|-----------------------------------------------------|
| S19-40_00020 | ydeA | putative protease YdeA                              |
| S19-40_00164 | -    | CAAX protease self-immunity                         |
| S19-40_00193 | aprX | Serine protease AprX                                |
| S19-40_00233 | albF | Putative zinc protease AlbF                         |
| S19-40_00239 | clpP | ATP-dependent Clp protease proteolytic subunit      |
| S19-40_00247 | -    | putative zinc protease                              |
| S19-40_00262 | rasP | Regulator of sigma-W protease RasP                  |
| S19-40_00302 | clpY | ATP-dependent protease ATPase subunit ClpY          |
| S19-40_00303 | clpQ | ATP-dependent protease subunit ClpQ                 |
| S19-40_00414 | lon  | Lon protease                                        |
| S19-40_00475 | -    | Thermophilic metalloprotease (M29)                  |
| S19-40_00555 | clpE | ATP-dependent Clp protease ATP-binding subunit ClpE |
| S19-40_00578 | htpX | Protease HtpX                                       |
| S19-40_00609 | isp  | Major intracellular serine protease                 |
| S19-40_00640 | htrA | Serine protease Do-like HtrA                        |
| S19-40_00669 | rip2 | Putative zinc metalloprotease Rip2                  |
| S19-40_00680 | albF | Putative zinc protease AlbF                         |
| S19-40_00908 | ctpB | Carboxy-terminal processing protease CtpB           |
| S19-40_00980 | clpP | ATP-dependent Clp protease proteolytic subunit      |
| S19-40_01141 | htrB | Serine protease Do-like HtrB                        |
| S19-40_01229 | paiB | Protease synthase and sporulation protein PAI 2     |
| S19-40_01403 | lasA | LasA protease                                       |
| S19-40_01404 | lasA | LasA protease                                       |
| S19-40_01415 | yraA | Putative cysteine protease YraA                     |
| S19-40_01448 | ydcP | putative protease YdcP                              |

|              |      |                                                     |
|--------------|------|-----------------------------------------------------|
| S19-40_01449 | ydcP | putative protease YdcP                              |
| S19-40_01512 | -    | Cysteine protease Prp                               |
| S19-40_01538 | lon1 | Lon protease 1                                      |
| S19-40_01539 | lon2 | Lon protease 2                                      |
| S19-40_01540 | clpX | ATP-dependent Clp protease ATP-binding subunit ClpX |
| S19-40_01953 | gluP | Rhomboid protease GluP                              |
| S19-40_02198 | mpr  | Extracellular metalloprotease                       |
| S19-40_02280 | -    | Putative phage serine protease XkdF                 |
| S19-40_02300 | ftsH | ATP-dependent zinc metalloprotease FtsH             |
| S19-40_02446 | nprB | Neutral protease B                                  |
| S19-40_02479 | wprA | Cell wall-associated protease                       |
| S19-40_02527 | htpX | Protease HtpX                                       |
| S19-40_02732 | bepA | Beta-barrel assembly-enhancing protease             |
| S19-40_02769 | prsW | Protease PrsW                                       |
| S19-40_02776 | -    | CAAX protease self-immunity                         |
| S19-40_02969 | gluP | Rhomboid protease GluP                              |
| S19-40_03037 | gpr  | Germination protease                                |
| S19-40_03091 | tsaD | Glycoprotease family protein                        |
| S19-40_03093 | tsaD | Glycoprotease family protein                        |
| S19-40_03100 | -    | CAAX protease self-immunity                         |
| S19-40_03218 | yccA | modulator of FtsH protease                          |
| S19-40_03275 | pfpL | Intracellular protease, PfpI family                 |
| S19-40_03413 | htpX | Protease HtpX                                       |
| S19-40_03455 | epr  | Minor extracellular protease Epr                    |
| S19-40_03486 | vpr  | Minor extracellular protease vpr                    |
| S19-40_03605 | ctpA | Carboxy-terminal processing protease CtpA           |
| S19-40_03706 | htrA | Serine protease Do-like HtrA                        |
| S19-40_03756 | -    | CAAX protease self-immunity                         |
| S19-40_03937 | clpX | ATP-dependent Clp protease ATP-binding subunit ClpX |
| S19-40_03955 | ftsH | ATP-dependent zinc metalloprotease FtsH             |
| S19-40_03982 | yabG | Sporulation-specific protease YabG                  |

---
