# Supplementary material for: Genome sequence analysis of the beneficial Bacillus subtilis PTA-271 isolated from a Vitis vinifera (cv. Chardonnay) rhizospheric soil: assets for sustainable biocontrol
Source: PubMed Central journal article supplement (PMC8067347; doi:10.1186/s40793-021-00372-3), 2021-01-29
Supplement: 40793_2021_372_MOESM4_ESM.pdf [file 40793_2021_372_MOESM4_ESM.pdf]

**Table S4 :** *Bacillus subtilis* PTA-271 encoding genes for sporulation

| Locus tag ID                     | Gene           | Function                                                |
|----------------------------------|----------------|---------------------------------------------------------|
| <i>Sporulation related genes</i> |                |                                                         |
| S19-40_00078                     | <i>yjcA</i>    | Sporulation protein YjcA                                |
| S19-40_00117                     | <i>ynzD</i>    | Spo0E like sporulation regulatory protein               |
| S19-40_00119                     | <i>sirA</i>    | Sporulation inhibitor of replication protein SirA       |
| S19-40_00176                     | <i>spoVK</i>   | Stage V sporulation protein K                           |
| S19-40_00177                     | <i>cwlC</i>    | Sporulation-specific N-acetylmuramoyl-L-alanine amidase |
| S19-40_00222                     | <i>spoVS</i>   | Stage V sporulation protein S                           |
| S19-40_00246                     | <i>ylmC</i>    | Sporulation protein, YlmC/YmxH family                   |
| S19-40_00387                     | <i>spoHGA</i>  | Sporulation sigma-E factor-processing peptidase         |
| S19-40_00401                     | <i>spoVD</i>   | Stage V sporulation protein D                           |
| S19-40_00416                     | <i>ylbJ</i>    | Sporulation integral membrane protein YlbJ              |
| S19-40_00471                     | <i>kinA</i>    | Sporulation kinase A                                    |
| S19-40_00495                     | -              | Sporulation protein cse15                               |
| S19-40_00522                     | <i>kinA</i>    | Sporulation kinase A                                    |
| S19-40_00539                     | <i>stoA</i>    | Sporulation thiol-disulfide oxidoreductase A            |
| S19-40_00540                     | <i>ykvU</i>    | Sporulation protein YkvU                                |
| S19-40_00541                     | <i>sleB</i>    | Spore cortex-lytic enzyme                               |
| S19-40_00545                     | <i>ydhD</i>    | Putative sporulation-specific glycosylase YdhD          |
| S19-40_00546                     | <i>ykvP</i>    | Spore protein YkvP                                      |
| S19-40_00547                     | <i>ykvP</i>    | Spore protein YkvP                                      |
| S19-40_00559                     | <i>kinD</i>    | Sporulation kinase D                                    |
| S19-40_00561                     | <i>spo0E</i>   | stage 0 sporulation regulatory protein                  |
| S19-40_00573                     | <i>kinE</i>    | Sporulation kinase E                                    |
| S19-40_00649                     | <i>spoIISA</i> | Stage II sporulation protein SA                         |
| S19-40_00650                     | <i>spoIISB</i> | Stage II sporulation protein SB                         |
| S19-40_00708                     | <i>spo0F</i>   | Sporulation initiation phosphotransferase F             |
| S19-40_00746                     | <i>spoIID</i>  | stage II sporulation protein D                          |
| S19-40_00766                     | <i>spoIIQ</i>  | Stage II sporulation protein Q                          |
| S19-40_00780                     | <i>spoIIID</i> | Stage III sporulation protein D                         |
| S19-40_00844                     | <i>gerBB</i>   | Spore germination protein B2                            |
| S19-40_00845                     | <i>gerBA</i>   | Spore germination protein B1                            |
| S19-40_00958                     | <i>whiA</i>    | Sporulation transcription regulator WhiA                |
| S19-40_00982                     | <i>cotR</i>    | Putative sporulation hydrolase CotR                     |
| S19-40_01032                     | <i>ydhD</i>    | Putative sporulation-specific glycosylase YdhD          |
| S19-40_01057                     | <i>sdpC</i>    | Sporulation delaying protein C                          |
| S19-40_01058                     | <i>sdpB</i>    | Sporulation-delaying protein SdpB                       |
| S19-40_01059                     | <i>sdpA</i>    | Sporulation-delaying protein SdpA                       |
| S19-40_01133                     | <i>gerAC</i>   | Spore germination protein A3                            |
| S19-40_01134                     | <i>gerAB</i>   | Spore germination protein A2                            |
| S19-40_01135                     | <i>gerAA</i>   | Spore germination protein A1                            |
| S19-40_01208                     | <i>yunB</i>    | Sporulation protein YunB                                |
| S19-40_01211                     | <i>YhcN</i>    | Sporulation lipoprotein, YhcN/YlaJ family               |
| S19-40_01229                     | <i>paiB</i>    | Protease synthase and sporulation protein PAI 2         |
| S19-40_01261                     | <i>YtvI</i>    | Sporulation integral membrane protein YtvI              |
| S19-40_01297                     | <i>kinE</i>    | Sporulation kinase E                                    |
| S19-40_01298                     | <i>kinE</i>    | Sporulation kinase E                                    |
| S19-40_01483                     | <i>spoVB</i>   | Stage V sporulation protein B                           |

|              |                |                                                      |
|--------------|----------------|------------------------------------------------------|
| S19-40_01500 | <i>coxA</i>    | Sporulation cortex protein CoxA                      |
| S19-40_01501 | <i>safA</i>    | SpoIVD-associated factor A                           |
| S19-40_01510 | <i>spo0B</i>   | Sporulation initiation phosphotransferase B          |
| S19-40_01514 | <i>spoIVFB</i> | Stage IV sporulation protein FB                      |
| S19-40_01515 | <i>spoIVFA</i> | Stage IV sporulation protein FA                      |
| S19-40_01523 | <i>spoIIB</i>  | Stage II sporulation protein B                       |
| S19-40_01529 | <i>spoVID</i>  | Stage VI sporulation protein D                       |
| S19-40_01557 | <i>gerM</i>    | Spore germination protein GerM                       |
| S19-40_01560 | <i>gerE</i>    | Spore germination protein GerE                       |
| S19-40_01642 | <i>ytrH</i>    | Sporulation membrane protein YtrH                    |
| S19-40_01643 | <i>ytrI</i>    | Sporulation membrane protein YtrI                    |
| S19-40_01727 | -              | Sporulation protein cse60                            |
| S19-40_01859 | <i>ydhD</i>    | Putative sporulation-specific glycosylase YdhD       |
| S19-40_01951 | <i>ydcC</i>    | Sporulation protein YdcC                             |
| S19-40_02076 | <i>nucB</i>    | Sporulation-specific extracellular nuclease          |
| S19-40_02162 | <i>cwlJ</i>    | Spore cortex-lytic enzyme                            |
| S19-40_02177 | <i>spo0A</i>   | Stage 0 sporulation protein A                        |
| S19-40_02216 | -              | Sigma-G-dependent sporulation-specific SASP protein  |
| S19-40_02229 | <i>skfC</i>    | Sporulation-killing factor biosynthesis protein SkfC |
| S19-40_02230 | <i>skfB</i>    | Sporulation killing factor maturation protein SkfB   |
| S19-40_02231 | <i>skfA</i>    | Sporulation killing factor                           |
| S19-40_02296 | <i>cwlA</i>    | Spore cortex-lytic enzyme                            |
| S19-40_02371 | <i>yjcA</i>    | Sporulation protein YjcA                             |
| S19-40_02372 | <i>cotV</i>    | Spore coat protein V                                 |
| S19-40_02373 | <i>cotW</i>    | Spore coat protein W                                 |
| S19-40_02374 | <i>cotX</i>    | Spore coat protein X                                 |
| S19-40_02375 | <i>cotY</i>    | Spore coat protein Y                                 |
| S19-40_02376 | <i>cotZ</i>    | Spore coat protein Z                                 |
| S19-40_02450 | <i>sdpA</i>    | Sporulation-delaying protein SdpA                    |
| S19-40_02451 | <i>sdpB</i>    | Sporulation-delaying protein SdpB                    |
| S19-40_02452 | <i>sdpC</i>    | Sporulation delaying protein C                       |
| S19-40_02483 | <i>yisI</i>    | Spo0E like sporulation regulatory protein            |
| S19-40_02484 | <i>gerPA</i>   | Spore germination protein gerPA/gerPF                |
| S19-40_02485 | <i>gerPB</i>   | Spore germination GerPB                              |
| S19-40_02486 | <i>gerPC</i>   | Spore germination protein GerPC                      |
| S19-40_02487 | <i>gerPD</i>   | Spore germination protein GerPD                      |
| S19-40_02488 | <i>gerPE</i>   | Spore germination protein GerPE                      |
| S19-40_02489 | <i>gerPF</i>   | Spore germination protein gerPA/gerPF                |
| S19-40_02559 | <i>yhaL</i>    | Sporulation protein YhaL                             |
| S19-40_02674 | <i>spo0M</i>   | Sporulation-control protein spo0M                    |
| S19-40_02725 | <i>YpjB</i>    | Sporulation protein YpjB                             |
| S19-40_02753 | <i>spoIVA</i>  | Stage IV sporulation protein A                       |
| S19-40_02767 | <i>ypeB</i>    | Sporulation protein YpeB                             |
| S19-40_02768 | <i>sleB</i>    | Spore cortex-lytic enzyme                            |
| S19-40_02812 | <i>spoVAF</i>  | stage V sporulation protein AF                       |
| S19-40_02813 | -              | stage V sporulation protein AE                       |
| S19-40_02814 | -              | stage V sporulation protein AE                       |
| S19-40_02815 | <i>spoVAD</i>  | stage V sporulation protein AD                       |
| S19-40_02816 | <i>spoVAC</i>  | stage V sporulation protein AC                       |
| S19-40_02817 | <i>spoVAB</i>  | stage V sporulation protein AB                       |

|              |                 |                                                                  |
|--------------|-----------------|------------------------------------------------------------------|
| S19-40_02818 | <i>spoVAA</i>   | stage V sporulation protein AA                                   |
| S19-40_02820 | <i>spoIIAB</i>  | stage II sporulation protein AB (anti-sigma F factor)            |
| S19-40_02821 | <i>spoIIAA</i>  | stage II sporulation protein AA (anti-sigma F factor antagonist) |
| S19-40_02828 | <i>spoIIM</i>   | Stage II sporulation protein M                                   |
| S19-40_02901 | <i>spo0A</i>    | Stage 0 sporulation protein A                                    |
| S19-40_02902 | <i>spoIVB</i>   | SpoIVB peptidase                                                 |
| S19-40_02915 | <i>spoIIIAH</i> | Stage III sporulation protein AH                                 |
| S19-40_02918 | <i>spoIIIAE</i> | Stage III sporulation protein AE                                 |
| S19-40_03018 | <i>yqfD</i>     | Sporulation protein YqfD                                         |
| S19-40_03019 | <i>yqfC</i>     | Sporulation protein YqfC                                         |
| S19-40_03055 | <i>cwlH</i>     | Spore cortex-lytic enzyme                                        |
| S19-40_03059 | <i>nucB</i>     | Sporulation-specific extracellular nuclease                      |
| S19-40_03771 | <i>soj</i>      | Sporulation initiation inhibitor protein Soj                     |
| S19-40_03960 | <i>spoIIE</i>   | Stage II sporulation protein E                                   |
| S19-40_03969 | <i>gerD</i>     | Stage V sporulation protein B                                    |
| S19-40_03970 | <i>spoVT</i>    | Stage V sporulation protein T                                    |
| S19-40_03977 | <i>spoVG</i>    | Putative septation protein SpoVG                                 |
| S19-40_03982 | <i>yabG</i>     | Sporulation-specific protease YabG                               |
| S19-40_04013 | <i>yaaH</i>     | Spore germination protein YaaH                                   |

---
