# Supplementary material for: Genome sequence analysis of the beneficial Bacillus subtilis PTA-271 isolated from a Vitis vinifera (cv. Chardonnay) rhizospheric soil: assets for sustainable biocontrol
Source: PubMed Central journal article supplement (PMC8067347; doi:10.1186/s40793-021-00372-3), 2021-01-29
Supplement: 40793_2021_372_MOESM5_ESM.pdf [file 40793_2021_372_MOESM5_ESM.pdf]

**Table S5 :** *Bacillus subtilis* PTA-271 encoding genes for some CYP450 and for Transferases.

| <b>Locus tag ID</b>            | <b>Gene</b> | <b>Function</b>                                                                     |
|--------------------------------|-------------|-------------------------------------------------------------------------------------|
| <i>P450 mono-oxygenases</i>    |             |                                                                                     |
| S19-40_00039                   | hpaB        | 4-hydroxyphenylacetate 3-monooxygenase                                              |
| S19-40_01036                   | luxA        | Alkanal monooxygenase alpha chain                                                   |
| S19-40_01390                   | ncd2/npd    | Nitronate monooxygenase                                                             |
| S19-40_01651                   | moxC        | Putative monooxygenase MoxC                                                         |
| S19-40_01653                   | camP        | 2,5-diketocamphane 1,2-monooxygenase                                                |
| S19-40_02002                   | mhuD, hmoB  | Antibiotic biosynthesis monooxygenase                                               |
| S19-40_02030                   | ycnE        | Putative monooxygenase YcnE                                                         |
| S19-40_02134                   | limB        | Limonene 1,2-monooxygenase                                                          |
| S19-40_02347                   | -           | Antibiotic biosynthesis monooxygenase                                               |
| S19-40_02506                   | otcC        | Anhydrotetracycline monooxygenase                                                   |
| S19-40_02544                   | hmoB        | Heme-degrading monooxygenase HmoB                                                   |
| S19-40_02664                   | ssuD        | Alkanesulfonate monooxygenase                                                       |
| S19-40_02844                   | -           | Antibiotic biosynthesis monooxygenase                                               |
| S19-40_03213                   | hmoA        | Heme-degrading monooxygenase HmoA                                                   |
| S19-40_03220                   | kmo         | Kynurenine 3-monooxygenase                                                          |
| S19-40_03485                   | luxB        | Alkanal monooxygenase beta chain                                                    |
| S19-40_03847                   | ntaA        | Nitritoltriacetate monooxygenase component A                                        |
| <i>dioxygenases</i>            |             |                                                                                     |
| S19-40_00125                   | fosB        | Glyoxalase/Bleomycin resistance protein/Dioxygenase superfamily protein             |
| S19-40_00563                   | mtnD        | Acireductone dioxygenase                                                            |
| S19-40_00645                   | mhqA        | Putative ring-cleaving dioxygenase MhqA                                             |
| S19-40_00719                   | -           | Glyoxalase/Bleomycin resistance protein/Dioxygenase superfamily protein             |
| S19-40_01175                   | -           | Glyoxalase/Bleomycin resistance protein/Dioxygenase superfamily protein             |
| S19-40_01333                   | cdoA        | Cysteine dioxygenase                                                                |
| S19-40_01883                   | mhqO        | Putative ring-cleaving dioxygenase MhqO                                             |
| S19-40_02093                   | hcaC        | 3-phenylpropionate/cinnamic acid dioxygenase ferredoxin subunit                     |
| S19-40_02313                   | hcaD        | 3-phenylpropionate/cinnamic acid dioxygenase ferredoxin--NAD(+) reductase component |
| S19-40_02851                   | -           | Glyoxalase/Bleomycin resistance protein/Dioxygenase superfamily protein             |
| S19-40_02870                   | -           | Glyoxalase/Bleomycin resistance protein/Dioxygenase superfamily protein             |
| S19-40_03214                   | -           | Glyoxalase/Bleomycin resistance protein/Dioxygenase superfamily protein             |
| S19-40_03313                   | catE        | Catechol-2,3-dioxygenase                                                            |
| S19-40_03371                   | -           | 2OG-Fe dioxygenase                                                                  |
| S19-40_03457                   | -           | Glyoxalase/Bleomycin resistance protein/Dioxygenase superfamily protein             |
| S19-40_03602                   | mhqE        | Putative ring-cleaving dioxygenase MhqE                                             |
| S19-40_03717                   | -           | Glyoxalase/Bleomycin resistance protein/Dioxygenase superfamily protein             |
| S19-40_03759                   | -           | Glyoxalase/Bleomycin resistance protein/Dioxygenase superfamily protein             |
| S19-40_03807                   | qdoI        | Quercetin 2,3-dioxygenase                                                           |
| <i>GST-GT-MT related genes</i> |             |                                                                                     |
| S19-40_00083                   | gcvH        | Glycine cleavage system H protein                                                   |
| S19-40_00328                   | fabD        | Malonyl CoA-acyl carrier protein transacylase                                       |
| S19-40_00397                   | ftsW        | putative peptidoglycan glycosyltransferase FtsW                                     |
| S19-40_00399                   | mraY        | Phospho-N-acetylmuramoyl-pentapeptide-transferase                                   |
| S19-40_00434                   | ftsW        | putative peptidoglycan glycosyltransferase FtsW                                     |
| S19-40_00547                   | -           | Glycosyl transferases group 1                                                       |
| S19-40_00588                   | -           | Glycosyl transferase family 2                                                       |
| S19-40_00592                   | ugtP        | Processive diacylglycerol beta-glucosyltransferase                                  |
| S19-40_00642                   | -           | putative glycosyltransferase                                                        |
| S19-40_00852                   | -           | glyco_rSAM_CFB: glycosyltransferase, GG-Bacteroidales peptide system                |
| S19-40_00853                   | -           | Glycosyl transferase WecB/TagA/CpsF family protein                                  |
| S19-40_00856                   | -           | Glycosyl transferase family 2                                                       |
| S19-40_00857                   | -           | CDP-Glycerol:Poly(glycerophosphate) glycerophosphotransferase                       |
| S19-40_00861                   | -           | Glycosyl transferase 1 domain A                                                     |
| S19-40_00862                   | -           | Glycosyl transferases group 1                                                       |
| S19-40_00863                   | -           | Glycosyl transferase family 2                                                       |
| S19-40_00869                   | -           | Glycosyl transferase family 2                                                       |
| S19-40_00872                   | -           | Glycosyl transferases group 1                                                       |
| S19-40_00876                   | -           | Glycosyl transferase family 2                                                       |
| S19-40_00877                   | -           | Glycosyl transferases group 1                                                       |
| S19-40_00878                   | -           | Glycosyl transferase family 4                                                       |
| S19-40_01001                   | -           | Glycosyl transferases group 1                                                       |
| S19-40_01002                   | -           | Glycosyl transferase family 2                                                       |
| S19-40_01003                   | -           | Glycosyl transferases group 1                                                       |
| S19-40_01005                   | -           | Glycosyl transferase family 2                                                       |

|              |   |                                               |
|--------------|---|-----------------------------------------------|
| S19-40_01007 | - | Glycosyl transferase family 2                 |
| S19-40_01589 | - | Glyoxalase-like domain protein                |
| S19-40_01806 | - | Glycosyl transferases group 1                 |
| S19-40_01809 | - | Glycosyl transferases group 1                 |
| S19-40_01858 | - | UDP-glucuronosyl and UDP-glucosyl transferase |
| S19-40_01985 | - | Glycosyltransferase like family 2             |
| S19-40_01997 | - | Methyltransferase domain protein              |
| S19-40_02321 | - | MGT: glycosyltransferase, MGT family          |
| S19-40_02705 | - | Transglycosylase                              |
| S19-40_02719 | - | Glycosyl transferases group 1                 |
| S19-40_02740 | - | Glycosyl transferase family, a/b domain       |
| S19-40_02973 | - | Glycosyl transferases group 1                 |
| S19-40_03228 | - | Glycosyl transferase family 2                 |
| S19-40_03344 | - | Glycosyl transferase family 2                 |
| S19-40_03391 | - | Methyltransferase domain protein              |
| S19-40_03452 | - | Glycosyl transferase family 8                 |
| S19-40_03483 | - | Cell cycle protein                            |
| S19-40_03497 | - | Glycosyl transferase family 2                 |
| S19-40_03504 | - | Glycosyl transferase family 2                 |
| S19-40_03586 | - | MGT: glycosyltransferase, MGT family          |
| S19-40_03626 | - | Glycosyl transferase family 2                 |
| S19-40_03656 | - | Monogalactosyldiacylglycerol (MGDG) synthase  |
| S19-40_03859 | - | Glycosyl transferase family, a/b domain       |

---

*Other transferases*

|              |            |                                                                       |
|--------------|------------|-----------------------------------------------------------------------|
| S19-40_00001 | araP       | L-arabinose transport system permease protein AraP                    |
| S19-40_00002 | araQ       | L-arabinose transport system permease protein AraQ                    |
| S19-40_00053 | ydaF       | Putative ribosomal N-acetyltransferase YdaF                           |
| S19-40_00065 | -          | g glut trans: gamma-glutamyltransferase                               |
| S19-40_00083 | -          | methylmalonyl-CoA carboxyltransferase 1.3S subunit                    |
| S19-40_00089 | gtab       | UTP--glucose-1-phosphate uridylyltransferase                          |
| S19-40_00090 | DPM1       | dolichol-phosphate mannosyltransferase                                |
| S19-40_00101 | plsY       | Glycerol-3-phosphate acyltransferase                                  |
| S19-40_00174 | pat        | Putative phenylalanine aminotransferase                               |
| S19-40_00185 | miaA       | tRNA dimethylallyltransferase                                         |
| S19-40_00207 | -          | Acyl transferase domain protein                                       |
| S19-40_00208 | -          | Acyl transferase domain protein                                       |
| S19-40_00219 | miaB       | miaB-methiolase: tRNA-i(6)A37 thiotransferase enzyme MiaB             |
| S19-40_00456 | arnB       | UDP-4-amino-4-deoxy-L-arabinose--oxoglutarate aminotransferase        |
| S19-40_00588 | arnC       | Undecaprenyl-phosphate 4-deoxy-4-formamido-L-arabinose transferase    |
| S19-40_00642 | arnC       | Undecaprenyl-phosphate 4-deoxy-4-formamido-L-arabinose transferase    |
| S19-40_00842 | -          | MFS transporter, SP family, arabinose:H <sup>+</sup> symporter        |
| S19-40_00856 | arnC       | Undecaprenyl-phosphate 4-deoxy-4-formamido-L-arabinose transferase    |
| S19-40_00869 | arnC       | Undecaprenyl-phosphate 4-deoxy-4-formamido-L-arabinose transferase    |
| S19-40_00876 | arnC       | Undecaprenyl-phosphate 4-deoxy-4-formamido-L-arabinose transferase    |
| S19-40_01002 | arnC       | Undecaprenyl-phosphate 4-deoxy-4-formamido-L-arabinose transferase    |
| S19-40_01005 | arnC       | Undecaprenyl-phosphate 4-deoxy-4-formamido-L-arabinose transferase    |
| S19-40_01007 | arnC       | Undecaprenyl-phosphate 4-deoxy-4-formamido-L-arabinose transferase    |
| S19-40_01011 | arnB       | UDP-4-amino-4-deoxy-L-arabinose--oxoglutarate aminotransferase        |
| S19-40_01037 | araR       | Arabinose metabolism transcriptional repressor                        |
| S19-40_01038 | araE       | Arabinose-proton symporter                                            |
| S19-40_01182 | araP       | L-arabinose transport system permease protein AraP                    |
| S19-40_01183 | araQ       | L-arabinose transport system permease protein AraQ                    |
| S19-40_01592 | araQ       | L-arabinose transport system permease protein AraQ                    |
| S19-40_01593 | araP       | L-arabinose transport system permease protein AraP                    |
| S19-40_01599 | araA       | L-arabinose isomerase                                                 |
| S19-40_01735 | araQ       | L-arabinose transport system permease protein AraQ                    |
| S19-40_01999 | mtlR       | mannitol operon transcriptional antiterminator                        |
| S19-40_02017 | mtlD       | Mannitol-1-phosphate 5-dehydrogenase                                  |
| S19-40_02018 | mtlF       | Mannitol-specific phosphotransferase enzyme IIA component             |
| S19-40_02019 | mtlA       | PTS system mannitol-specific EIICB component                          |
| S19-40_02074 | kdsD, kpsF | arabinose-5-phosphate isomerase                                       |
| S19-40_02473 | araC       | Arabinose operon regulatory protein                                   |
| S19-40_02501 | arnB       | UDP-4-amino-4-deoxy-L-arabinose--oxoglutarate aminotransferase        |
| S19-40_02720 | mshB       | thiol_BshB1: bacillithiol biosynthesis deacetylase BshB1              |
| S19-40_02770 | ypdA       | Bthiol_YpdA: putative bacillithiol system oxidoreductase, YpdA family |
| S19-40_03197 | araQ       | L-arabinose transport system permease protein AraQ                    |
| S19-40_03210 | araQ       | L-arabinose transport system permease protein AraQ                    |

|              |            |                                                                                           |
|--------------|------------|-------------------------------------------------------------------------------------------|
| S19-40_03228 | arnC       | Undecaprenyl-phosphate 4-deoxy-4-formamido-L-arabinose transferase                        |
| S19-40_03323 | yfiT       | DinB superfamily protein                                                                  |
| S19-40_03344 | arnC       | Undecaprenyl-phosphate 4-deoxy-4-formamido-L-arabinose transferase                        |
| S19-40_03497 | arnC       | Undecaprenyl-phosphate 4-deoxy-4-formamido-L-arabinose transferase                        |
| S19-40_03506 | arnB       | UDP-4-amino-4-deoxy-L-arabinose--oxoglutarate aminotransferase                            |
| S19-40_03591 | BshB2      | thiol_BshB2: bacillithiol biosynthesis deacetylase BshB2                                  |
| S19-40_03695 | mshD       | Mycothiol acetyltransferase                                                               |
| S19-40_03700 | rocD       | Ornithine aminotransferase                                                                |
| S19-40_03723 | arnT, pmrK | 4-amino-4-deoxy-L-arabinose transferase                                                   |
| S19-40_03723 | -          | Dolichyl-phosphate-mannose-protein mannosyltransferase                                    |
| S19-40_03744 | -          | Acetyltransferase                                                                         |
| S19-40_03746 | wecD       | dTDP-fucosamine acetyltransferase                                                         |
| S19-40_03758 | maa        | Maltose O-acetyltransferase                                                               |
| S19-40_03774 | rsmG       | Ribosomal RNA small subunit methyltransferase G                                           |
| S19-40_03791 | -          | phosphotransferase system, EIIB                                                           |
| S19-40_03848 | ytmI       | putative N-acetyltransferase YtmI                                                         |
| S19-40_03859 | -          | Glycosyl transferase family, a/b domain                                                   |
| S19-40_03911 | cysN       | Sulfate adenylyltransferase subunit 1                                                     |
| S19-40_03918 | rlmG       | Ribosomal RNA large subunit methyltransferase G                                           |
| S19-40_03927 | -          | Putative TrmH family tRNA/rRNA methyltransferase                                          |
| S19-40_03930 | cysE       | Serine acetyltransferase                                                                  |
| S19-40_03933 | ispD       | 2-C-methyl-D-erythritol 4-phosphate cytidylyltransferase                                  |
| S19-40_03948 | -          | ilvE_I: branched-chain amino acid aminotransferase                                        |
| S19-40_03976 | glmU       | glmU: UDP-N-acetylglucosamine diphosphorylase/glucosamine-1-phosphate N-acetyltransferase |
| S19-40_03983 | rsmA       | Ribosomal RNA small subunit methyltransferase A                                           |
| S19-40_03989 | rsmI       | Ribosomal RNA small subunit methyltransferase I                                           |
| S19-40_03991 | yfiC       | tRNA1(Val) (adenine(37)-N6)-methyltransferase                                             |
| S19-40_03998 | glyA       | Serine hydroxymethyltransferase                                                           |

---
