# Supplementary material for: Genome sequence analysis of the beneficial Bacillus subtilis PTA-271 isolated from a Vitis vinifera (cv. Chardonnay) rhizospheric soil: assets for sustainable biocontrol
Source: PubMed Central journal article supplement (PMC8067347; doi:10.1186/s40793-021-00372-3), 2021-01-29
Supplement: 40793_2021_372_MOESM6_ESM.pdf [file 40793_2021_372_MOESM6_ESM.pdf]

**Table S6 :** *Bacillus subtilis* PTA-271 encoding genes for lactonases,  $\beta$ -lactamases, deaminases, deacetylases

| Locus tag ID                         | Gene                   | Function                                                                                      |
|--------------------------------------|------------------------|-----------------------------------------------------------------------------------------------|
| <i>lactone hydrolase</i>             |                        |                                                                                               |
| S19-40_01709                         | ahlD, aiiA, attM, blcC | N-acyl homoserine lactone hydrolase                                                           |
| S19-40_02014                         | -                      | Dienelactone hydrolase family protein                                                         |
| S19-40_02855                         | ahlD, aiiA, attM, blcC | N-acyl homoserine lactone hydrolase                                                           |
| S19-40_03601                         | -                      | Dienelactone hydrolase family protein                                                         |
| <i><math>\beta</math>-lactamases</i> |                        |                                                                                               |
| S19-40_00019                         | penP                   | Beta-lactamase                                                                                |
| S19-40_00225                         | -                      | Beta-lactamase                                                                                |
| S19-40_00240                         | -                      | Metallo-beta-lactamase superfamily protein                                                    |
| S19-40_00467                         | -                      | Metallo-beta-lactamase superfamily protein                                                    |
| S19-40_00991                         | -                      | Beta-lactamase                                                                                |
| S19-40_01661                         | -                      | Beta-lactamase superfamily domain protein                                                     |
| S19-40_01709                         | -                      | Metallo-beta-lactamase superfamily protein                                                    |
| S19-40_02214                         | ybxI                   | putative beta-lactamase YbxI                                                                  |
| S19-40_02259                         | -                      | Beta-lactamase                                                                                |
| S19-40_02532                         | -                      | Beta-lactamase superfamily domain protein                                                     |
| S19-40_02855                         | -                      | Metallo-beta-lactamase superfamily protein                                                    |
| S19-40_02861                         | -                      | Beta-lactamase superfamily domain protein                                                     |
| S19-40_02961                         | -                      | Metallo-beta-lactamase superfamily protein                                                    |
| S19-40_03257                         | -                      | Metallo-beta-lactamase superfamily protein                                                    |
| S19-40_03550                         | bla2, blm, ccrA, blaB  | metallo-beta-lactamase class B                                                                |
| S19-40_03707                         | -                      | Metallo-beta-lactamase superfamily protein                                                    |
| S19-40_03742                         | bla2, blm, ccrA, blaB  | metallo-beta-lactamase class B                                                                |
| <i>deaminases</i>                    |                        |                                                                                               |
| S19-40_00468                         | adeC                   | Adenine deaminase                                                                             |
| S19-40_00611                         | guaD                   | Guanine deaminase                                                                             |
| S19-40_00930                         | nagB                   | Glucosamine-6-phosphate deaminase 1                                                           |
| S19-40_01533                         | hemC                   | Porphobilinogen deaminase                                                                     |
| S19-40_01675                         | mtaD                   | 5-methylthioadenosine/S-adenosylhomocysteine deaminase                                        |
| S19-40_02187                         | nagB                   | Glucosamine-6-phosphate deaminase 1                                                           |
| S19-40_02802                         | tadA                   | tRNA-specific adenosine deaminase                                                             |
| S19-40_03012                         | cdd                    | Cytidine deaminase                                                                            |
| S19-40_03042                         | tadA                   | tRNA-specific adenosine deaminase                                                             |
| S19-40_03150                         | yerA                   | Putative adenine deaminase YerA                                                               |
| S19-40_03978                         | yabJ                   | 2-iminobutanoate/2-iminopropanoate deaminase                                                  |
| S19-40_04015                         | tadA                   | tRNA-specific adenosine deaminase                                                             |
| <i>deacetylases</i>                  |                        |                                                                                               |
| S19-40_00248                         | pdaA                   | Peptidoglycan-N-acetylmuramic acid deacetylase PdaA                                           |
| S19-40_00383                         | argE                   | Acetylornithine deacetylase                                                                   |
| S19-40_00501                         | ykuR                   | N-acetyldiaminopimelate deacetylase                                                           |
| S19-40_00931                         | nagA                   | N-acetylglucosamine-6-phosphate deacetylase                                                   |
| S19-40_01649                         | -                      | N-acetyldiaminopimelate deacetylase                                                           |
| S19-40_01692                         | -                      | Histone deacetylase domain protein                                                            |
| S19-40_02104                         | cah                    | Cephalosporin-C deacetylase                                                                   |
| S19-40_02121                         | -                      | N-acetyldiaminopimelate deacetylase                                                           |
| S19-40_02333                         | pdaC                   | Peptidoglycan-N-acetylmuramic acid deacetylase PdaC                                           |
| S19-40_02535                         | lysK                   | N-acetyl-lysine deacetylase                                                                   |
| S19-40_02547                         | -                      | N-acetyldiaminopimelate deacetylase                                                           |
| S19-40_02585                         | pgdA                   | Peptidoglycan-N-acetylglucosamine deacetylase                                                 |
| S19-40_02586                         | cobB                   | NAD-dependent protein deacetylase                                                             |
| S19-40_02720                         | bshB1                  | N-acetyl-alpha-D-glucosaminyl L-malate deacetylase 1                                          |
| S19-40_02857                         | argE                   | acetylornithine deacetylase                                                                   |
| S19-40_03287                         | pdaA                   | Peptidoglycan-N-acetylmuramic acid deacetylase PdaA                                           |
| S19-40_03411                         | icaB                   | Poly-beta-1,6-N-acetyl-D-glucosamine N-deacetylase                                            |
| S19-40_03591                         | bshB2                  | putative N-acetyl-alpha-D-glucosaminyl L-malate deacetylase 2                                 |
| S19-40_03620                         | argE                   | Acetylornithine deacetylase                                                                   |
| S19-40_03852                         | -                      | N-acetyldiaminopimelate deacetylase                                                           |
| S19-40_03867                         | pdaA                   | Peptidoglycan-N-acetylmuramic acid deacetylase PdaA                                           |
| <i>other deacetylases</i>            |                        |                                                                                               |
| S19-40_02720                         | -                      | GlcNAc-PI de-N-acetylase                                                                      |
| S19-40_03287                         | -                      | spore_pdaA: delta-lactam-biosynthetic de-N-acetylase                                          |
| S19-40_03591                         | -                      | GlcNAc-PI de-N-acetylase                                                                      |
| S19-40_02720                         | -                      | GlcNAc-PI de-N-acetylase                                                                      |
| S19-40_03287                         | -                      | spore_pdaA: delta-lactam-biosynthetic de-N-acetylase                                          |
| S19-40_03591                         | -                      | GlcNAc-PI de-N-acetylase                                                                      |
| S19-40_03824                         | mmsA, iolA, ALDH6A1    | malonate-semialdehyde dehydrogenase (acetylating) / methylmalonate-semialdehyde dehydrogenase |
| <i>other (de)acylases</i>            |                        |                                                                                               |

|              |           |                                                                            |
|--------------|-----------|----------------------------------------------------------------------------|
| S19-40_00208 | fabD      | Malonyl CoA-acyl carrier protein transacylase                              |
| S19-40_00210 | pksC      | Polyketide biosynthesis malonyl CoA-acyl carrier protein transacylase PksC |
| S19-40_00328 | fabD      | Malonyl CoA-acyl carrier protein transacylase                              |
| S19-40_01475 | dtd       | D-aminoacyl-tRNA deacylase                                                 |
| S19-40_02338 | ybaK      | Cys-tRNA(Pro)/Cys-tRNA(Cys) deacylase YbaK                                 |
| S19-40_02881 | DBT, bkdB | 2-oxoisovalerate dehydrogenase E2 component (dihydrolipoyl transacylase)   |
| S19-40_03846 | -         | Penicillin acylase                                                         |

---
