# Supplementary material for: Genome sequence analysis of the beneficial Bacillus subtilis PTA-271 isolated from a Vitis vinifera (cv. Chardonnay) rhizospheric soil: assets for sustainable biocontrol
Source: PubMed Central journal article supplement (PMC8067347; doi:10.1186/s40793-021-00372-3), 2021-01-29
Supplement: 40793_2021_372_MOESM8_ESM.pdf [file 40793_2021_372_MOESM8_ESM.pdf]

**Table S8:** Anti-SMASH 5.1.0 prediction of gene clusters responsible for secondary metabolite production in *Bacillus subtilis* PTA-271.

| <b>Secondary metabolite</b>             | <b>Enzyme</b> | <b>Gene clusters</b> | <b>Compound</b>            | <b>Similarity</b> |
|-----------------------------------------|---------------|----------------------|----------------------------|-------------------|
| Betalactone-NRPS                        | NRPS          | 1                    | Fengycin                   | 100%              |
| NRPS                                    | NRPS          | 2                    | Bacillibactin              | 100%              |
|                                         |               |                      | Surfactin                  | 78%               |
| Other                                   | NRPS          | 1                    | Bacilysin                  | 100%              |
| T3PKS                                   | PKS           | 1                    | -                          | 0%                |
| TransATPKS-NRPS-PKSlike                 | PKS/NRPS      | 1                    | Bacillaene                 | 100%              |
| tRNA-dependent cyclodipeptide synthases | -             | 1                    | -                          | 0%                |
| Terpene                                 | -             | 2                    | -                          | 0%                |
| Sactipeptide                            | RIPP          | 2                    | Subtilisin A               | 100%              |
|                                         |               |                      | Sporulation killing factor | 100%              |
